# Supplementary material
Source: publisher site journal article supplement (https://www.dovepress.com/article/262171)
Supplement: Supplementary file 1 [file get_supplementary_file.php]

| **Test Time Interval** | | **limitations** | **aPerformance**  **& complexity** | | | **Benefits** |  | |
| --- | --- | --- | --- | --- | --- | --- | --- | --- |
| **Visual Examinations** | | | | | | | | |
| 10 years | • Full bowel cleansing  • Can be expensive  •Sedation usually needed, necessitating a chaperone to return home  • Patient may miss a day of work.  • Highest risk of bowel tears or infections compared with other tests | | | Performance: Highest Complexity: Highest | • Examines entire colon  • Can biopsy and remove polyps  • Can diagnose other diseases  • Required for abnormal results from all other tests | | | **Colonoscopy** |
| 5 years | • Full bowel cleansing  • Cannot remove polyps or perform biopsies  • Exposure to low-dose radiation  • Colonoscopy necessary if positive  • Not covered by all insurance plans | | | Performance: High (for large polyps) Complexity: Intermediate | •Examines entire colon  • Fairly quick  • Few complications  • No sedation needed  • Noninvasive | | | **Computed tomographic colonography (CTC)** |
| 5 years | • Full bowel cleansing  •Some false-positive test results  • Cannot remove polyps or perform biopsies  • Exposure to low-dose radiation  • Colonoscopy necessary if abnormalities are detected  • Very limited availability | | | Performance: High (for large polyps) Complexity: High | •Can usually view entire colon  • Few complications  • No sedation needed | | | **Double-contrast barium enema** |
| 5 years | • Partial bowel cleansing  • Views only one-third of colon  • Cannot remove large polyps  • Small risk of infection or bowel tear  • Slightly more effective when combined with annual fecal occult blood testing  • Colonoscopy necessary if positive  • Limited availability | | | Performance: High for rectum & lower one-third of the colon Complexity: Intermediate | •Fairly quick  • Few complications  • Minimal bowel preparation  • Does not require sedation or a specialist | | | **Flexible sigmoidoscopy** |
| Stool Tests (Low-sensitivity stool tests, such as single-sample FOBT done in the doctor’s office or toilet bowl tests are not recommended.) | | | | | | | | |
| Annual | •Requires multiple stool samples  • Will miss most polyps  • May produce false-positive test results • Slightly more effective when combined with a flexible sigmoidoscopy every five years  • Colonoscopy necessary if positive | | | Performance:  Intermediate for cancer Complexity: Low | | •No bowel cleansing or sedation  • Performed at home  • Low cost  • Noninvasive | | **Fecal immunochemical test (FIT)** |
| Annual | • Requires multiple stool samples  • Will miss most polyps  • May produce false-positive test results  • Pre-test dietary limitations  • Slightly more effective when combined with a flexible sigmoidoscopy every five years  • Colonoscopy necessary if positive | | | Performance: Intermediate for cancer Complexity: Low | | • No bowel cleansing  • Performed at home  • Low cost  • Noninvasive | | **High-sensitivity guaiac-based fecal occult blood test (gFOBT)** |
| 3 years, per manufacturer’s recommendation | • Will miss most polyps • More false-positive results than other tests  • Higher cost than gFOBT and FIT  • Colonoscopy necessary if positive | | | Performance: Intermediate for cancer Complexity: Low | | • No bowel cleansing  • Can be performed at home  • Requires only a single stool sample  • Noninvasive | | **FIT-DNA test** |
| a Complexity involves patient preparation, inconvenience, facilities and equipment needed, and patient discomfort. | | | | | | | | |

**Appendix 1** Characteristics of the recommended methods for CRC screening
